# Supplementary material for: Construction of Ru/FeCoP heterointerface to drive dual active site mechanism for efficient overall water splitting
Source: Royal Society of Chemistry journal article supplement (doi:10.1039/d2ta03465d), 2022-01-01
Supplement: d2ta03465d1.pdf [file d2ta03465d1.pdf]

## Supporting Information

### **Construction of Ru/FeCoP Heterointerface to Drive Dual Active Sites Mechanism for Efficient Overall Water Splitting**

Yilin Wang,<sup>a</sup> Yunmei Du,<sup>\*b</sup> Ziqi Fu,<sup>a</sup> Jinhong Ren,<sup>b</sup> Yunlei Fu<sup>a</sup> and Lei Wang<sup>\*a,b</sup>

<sup>a</sup> College of Chemistry and Molecular Engineering, Qingdao University of Science and Technology, Key Laboratory of Eco-chemical Engineering, Key Laboratory of Optic-electric Sensing and Analytical Chemistry of Life Science, Taishan Scholar Advantage and Characteristic Discipline Team of Eco Chemical Process and Technology, Qingdao 266042, P. R. China.

<sup>b</sup> College of Environment and Safety Engineering, Qingdao University of Science and Technology, Shandong Engineering Research Center for Marine Environment Corrosion and Safety Protection, Qingdao 266042, P. R. China

\*E-mail: duyunmeiqst@163.com (Yunmei Du); inorchemwl@126.com (Lei Wang)

## DFT calculations

DFT calculations were performed in the Vienna ab initio simulation package (VASP), using the projector augmented wave (PAW) method. The exchange-correlation potential was represented by the Perdew-Burke-Ernzerhof (PBE) functional within the generalized gradient approximation (GGA). All-electron plane-wave basis sets with an energy cutoff of 450 eV, and the convergence tolerances of energy and force are set to  $1.0 \times 10^{-5}$  eV/atom and  $3.0 \times 10^{-2}$  eV/Å, respectively. The  $k$ -point sampling grid is set to  $2 \times 2 \times 1$ . A 15 Å vacuum layer was added to avoid the interaction between adjacent layers. Meanwhile, the DFT-D correction method is used to describe the van der Waals interaction.

The free energy change ( $\Delta G_{H^*}$ ) for adsorptions were determined as follows:

$$\Delta G_{H^*} = \Delta E + \Delta E_{ZPE} - T\Delta S$$

where  $\Delta E$  is the total energy difference,  $\Delta E_{ZPE}$  is the zero-point energy change,  $T$  is the temperature ( $T = 298.15$  K), and  $\Delta S$  is the entropy change.

## Figures and Tables

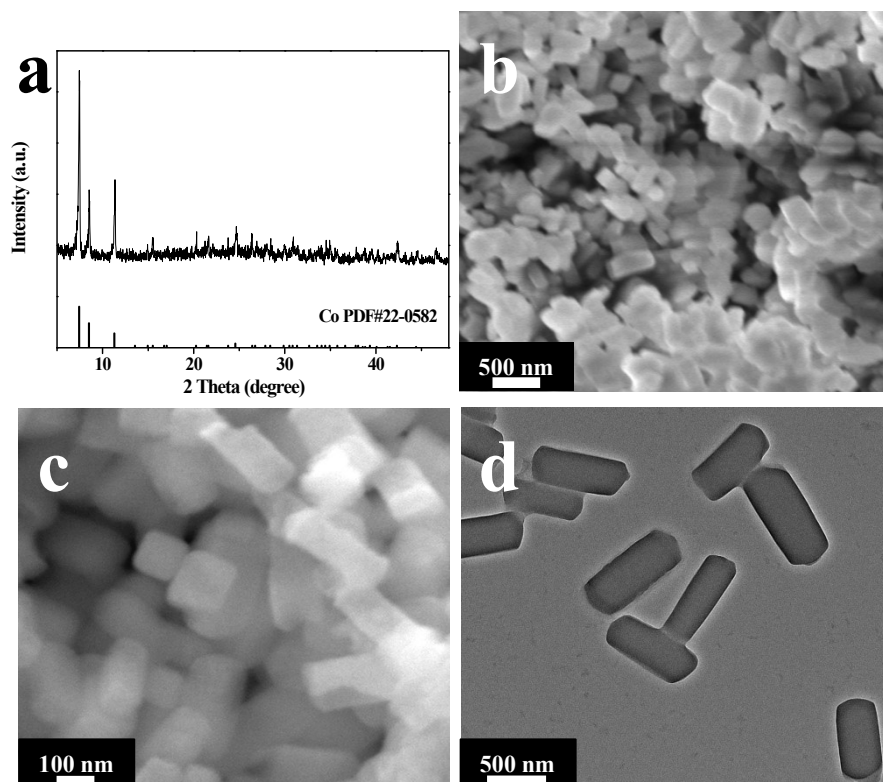

**Figure S1** (a) XRD pattern, (b-c) SEM images and (d) TEM image of Co precursor.

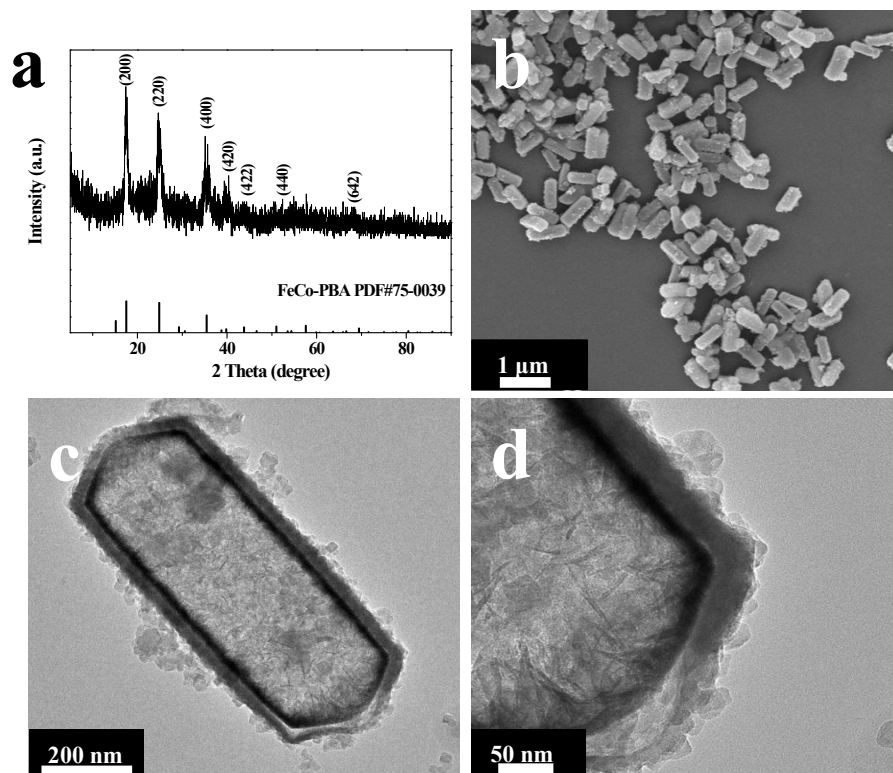

**Figure S2** (a) XRD pattern, (b) SEM image and (c-d) TEM images of FeCo-PBA.

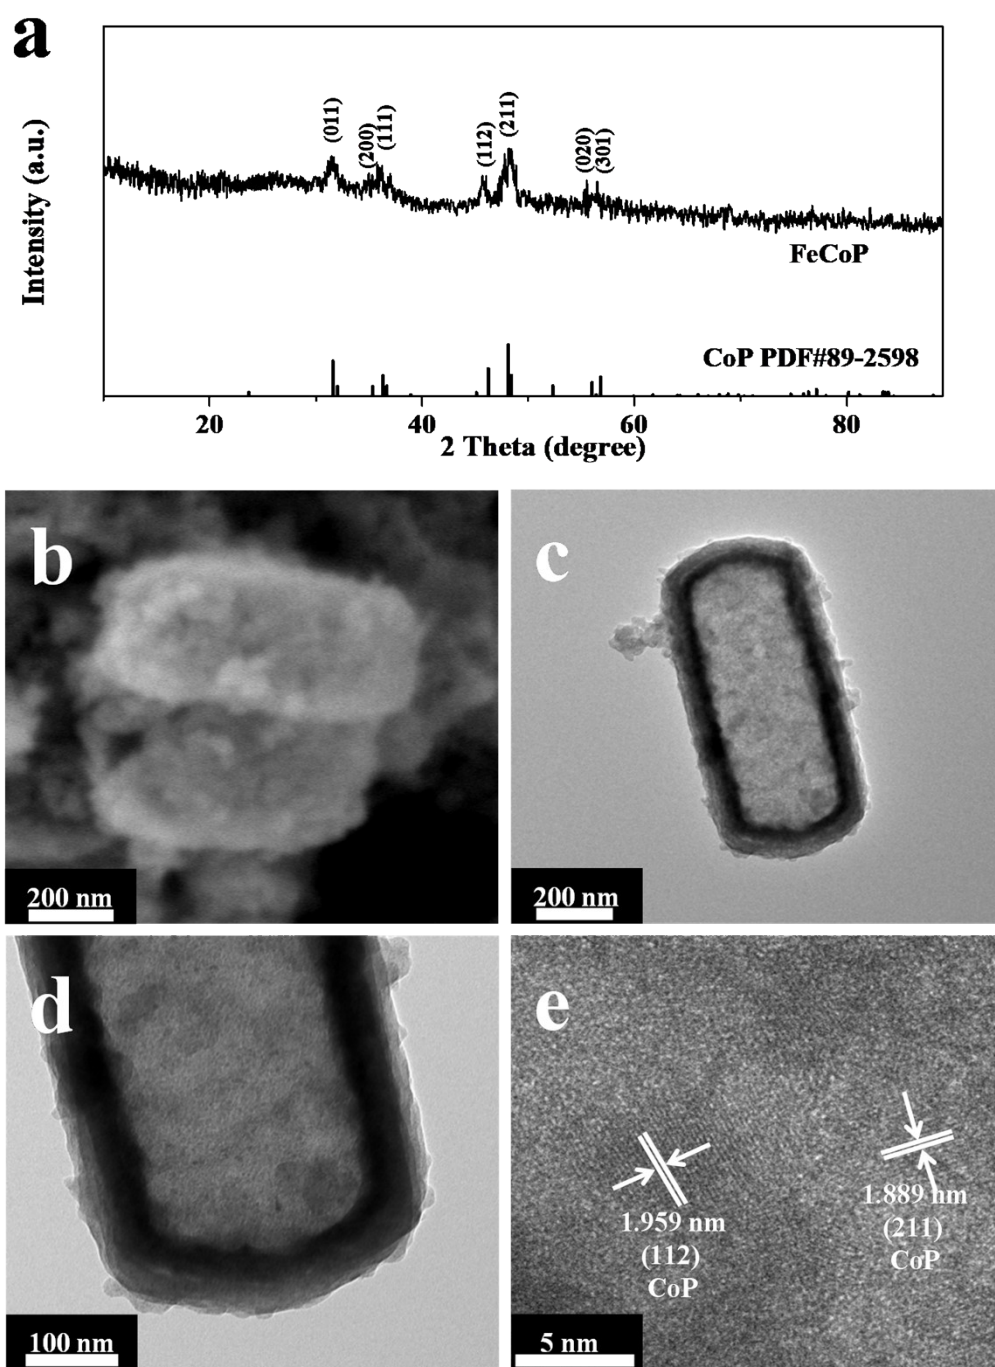

**Figure S3** (a) XRD pattern, (b) SEM image, (c-d) TEM images and (e) High-resolution TEM image of FeCoP.

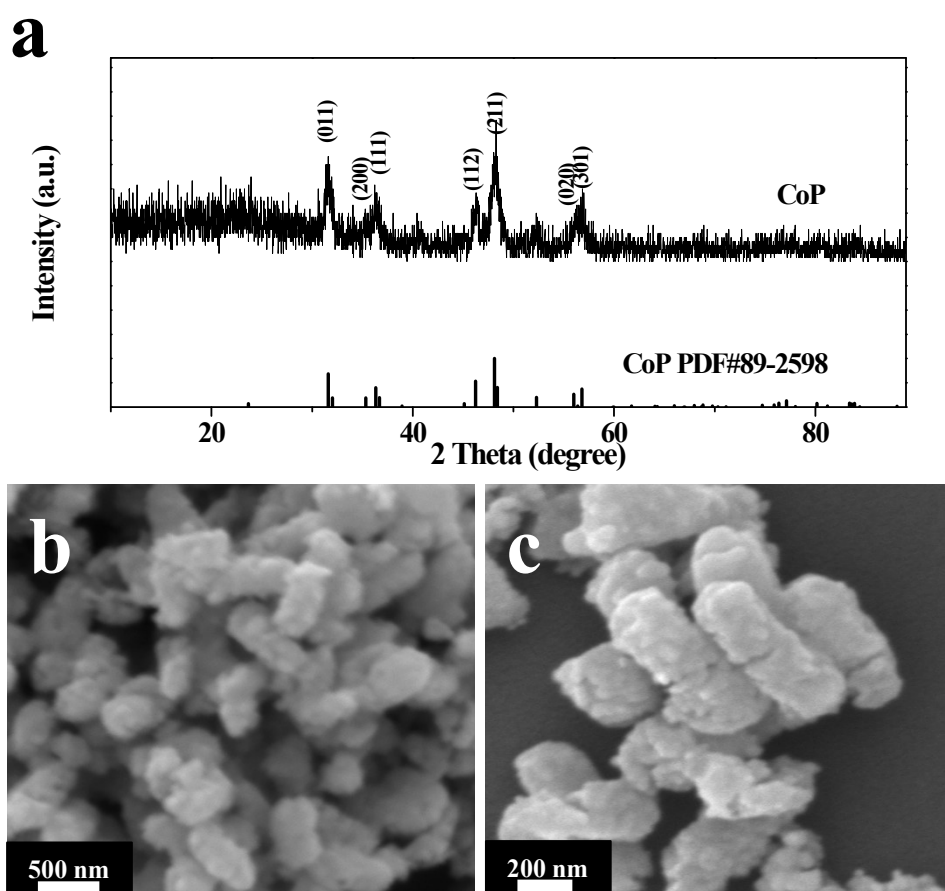

**Figure S4** (a) XRD pattern, (b-c) SEM images of CoP.

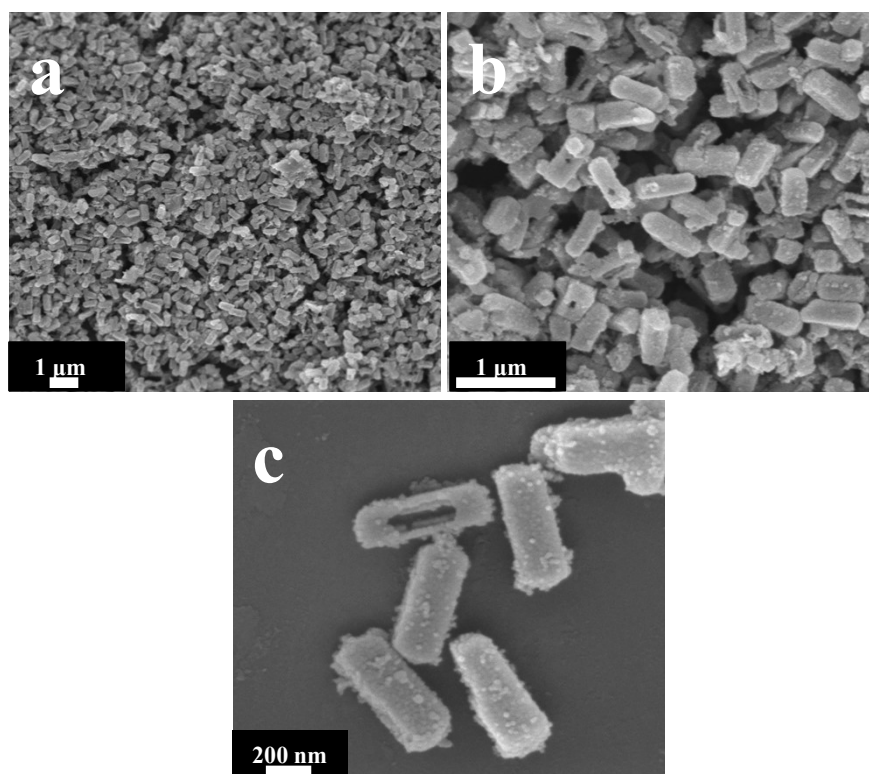

**Figure S5** (a-c) SEM images of Ru@FeCoP.

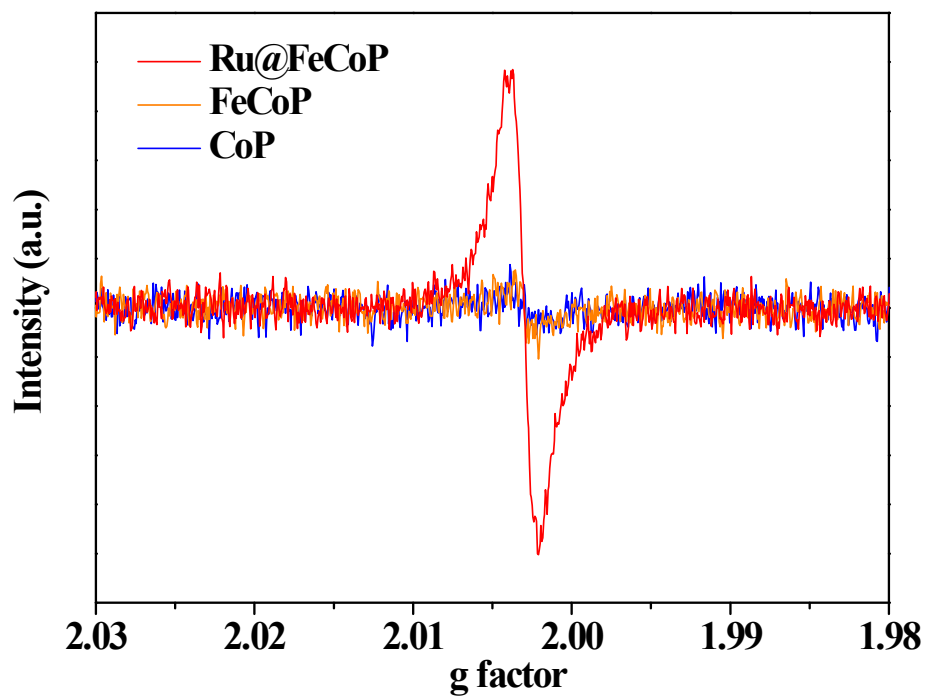

**Figure S6** The EPR of Ru@FeCoP, FeCoP, and CoP.



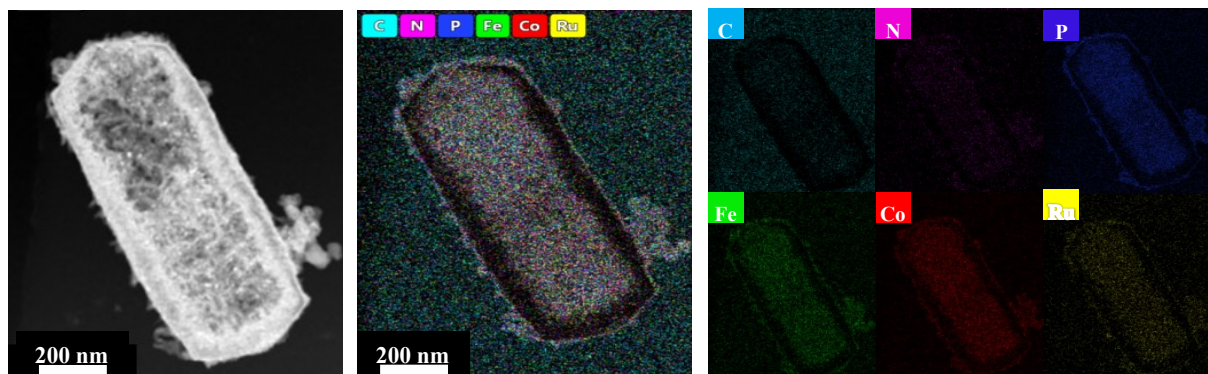

**Figure S7** EDX elemental mappings of Ru@FeCoP.

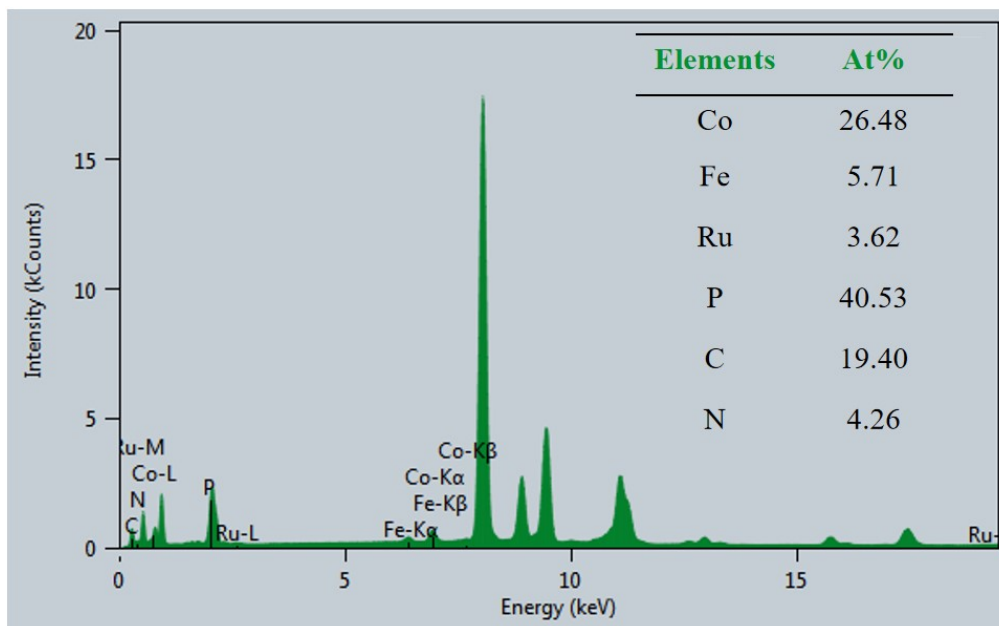

**Figure S8** EDX of Ru@FeCoP catalyst.

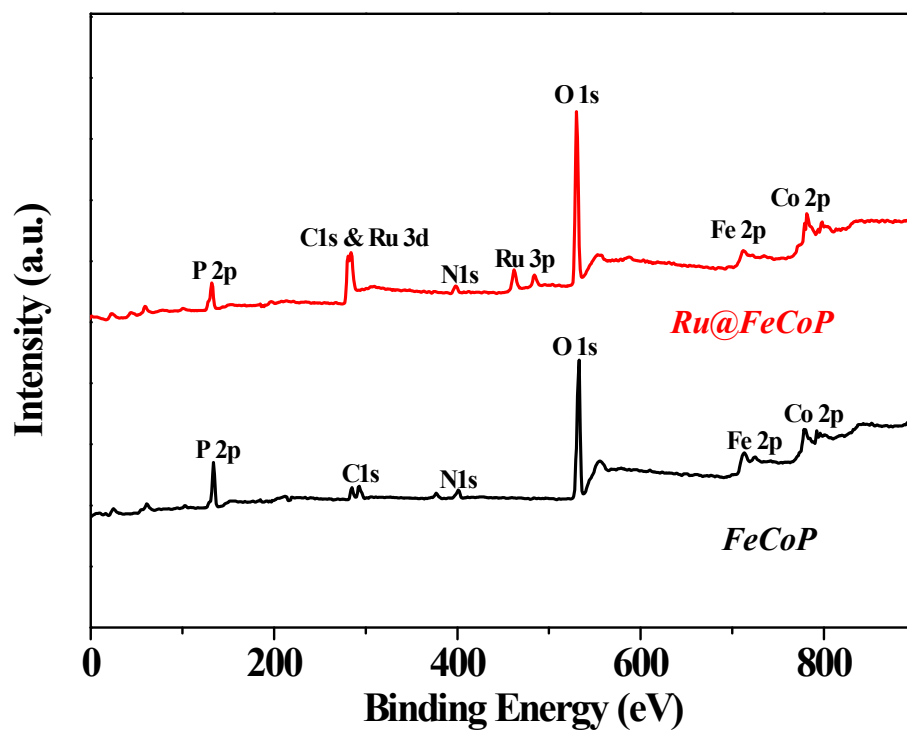

**Figure S9** XPS survey spectra of Ru@FeCoP and FeCoP.

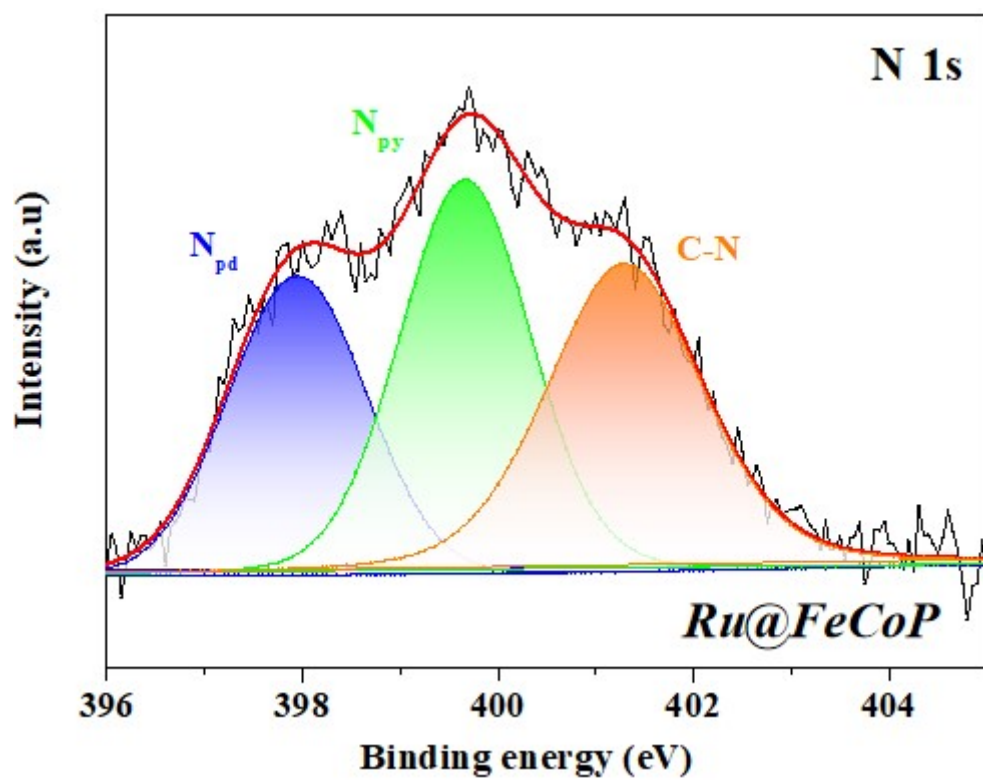

Figure S10 XPS spectra of N 1s in Ru@FeCoP.

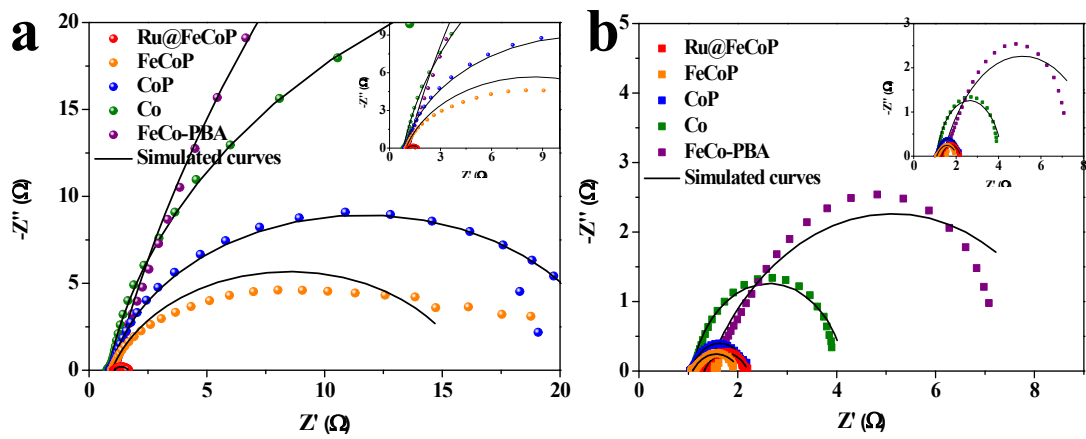

**Figure S11** Nyquist plots of Ru@FeCoP, FeCoP, CoP, FeCo-PBA and Co precursor for (a) HER, (b) OER.

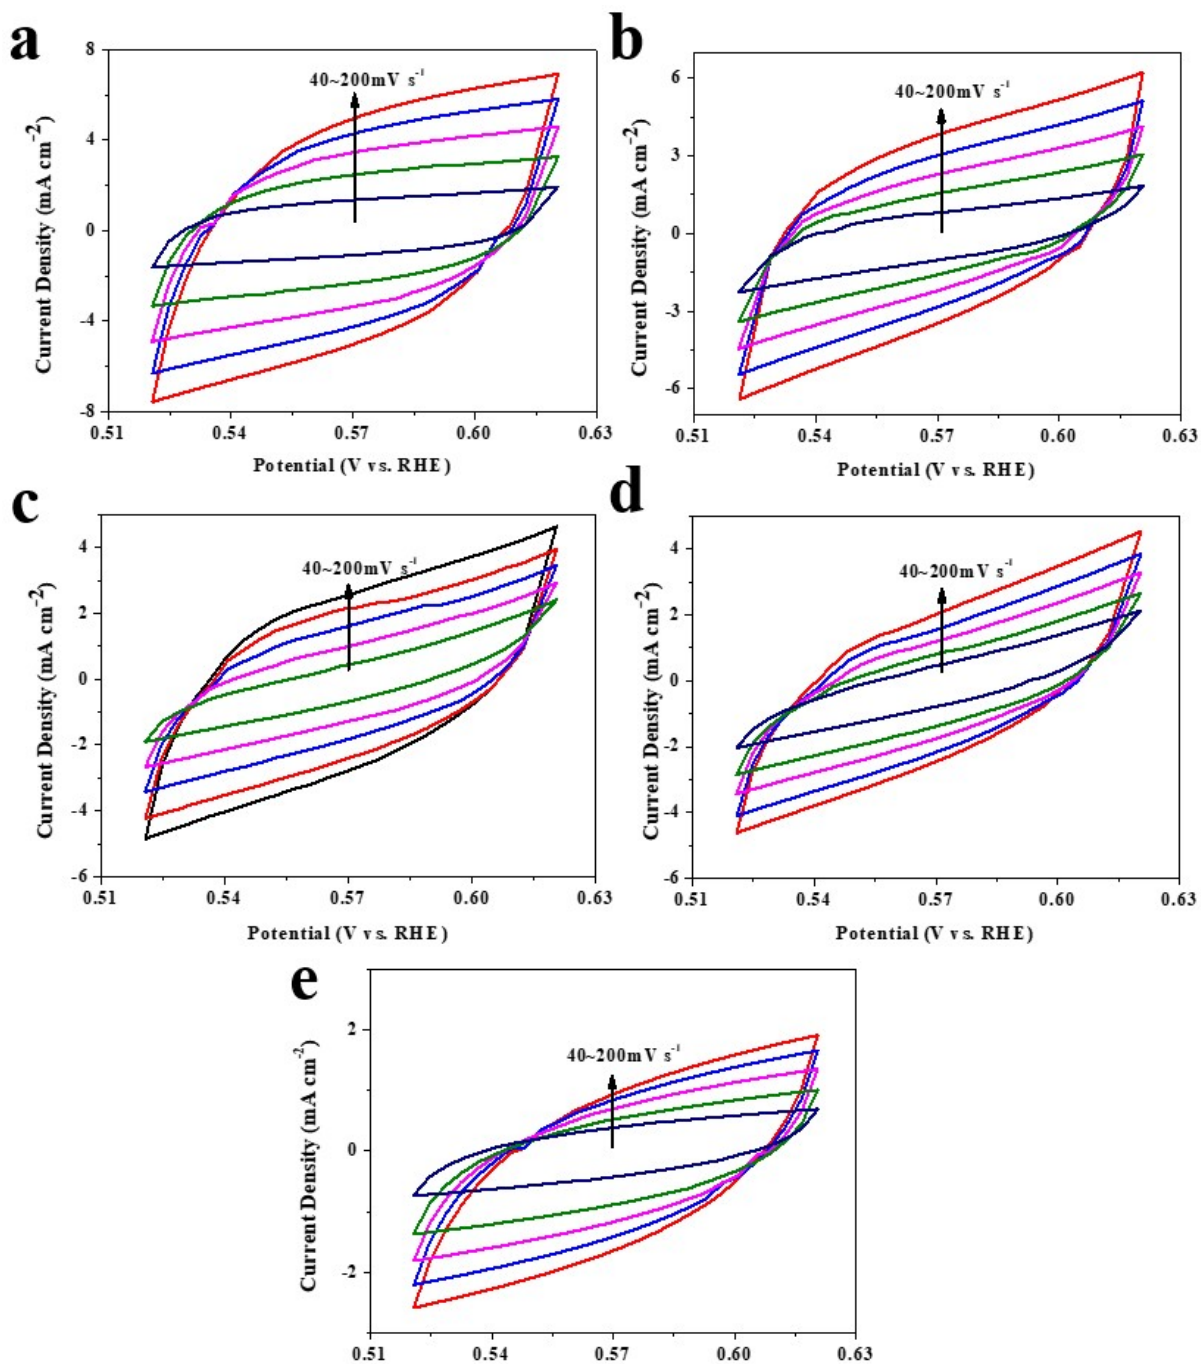

**Figure S12** Cyclic voltammetry curves at 0.521~0.621 V vs RHE for (a) Ru@FeCoP, (b) FeCoP, (c) CoP, and (d) Co (e) FeCo-PBA with different scan rates from 40 to 200 mV s<sup>-1</sup>.

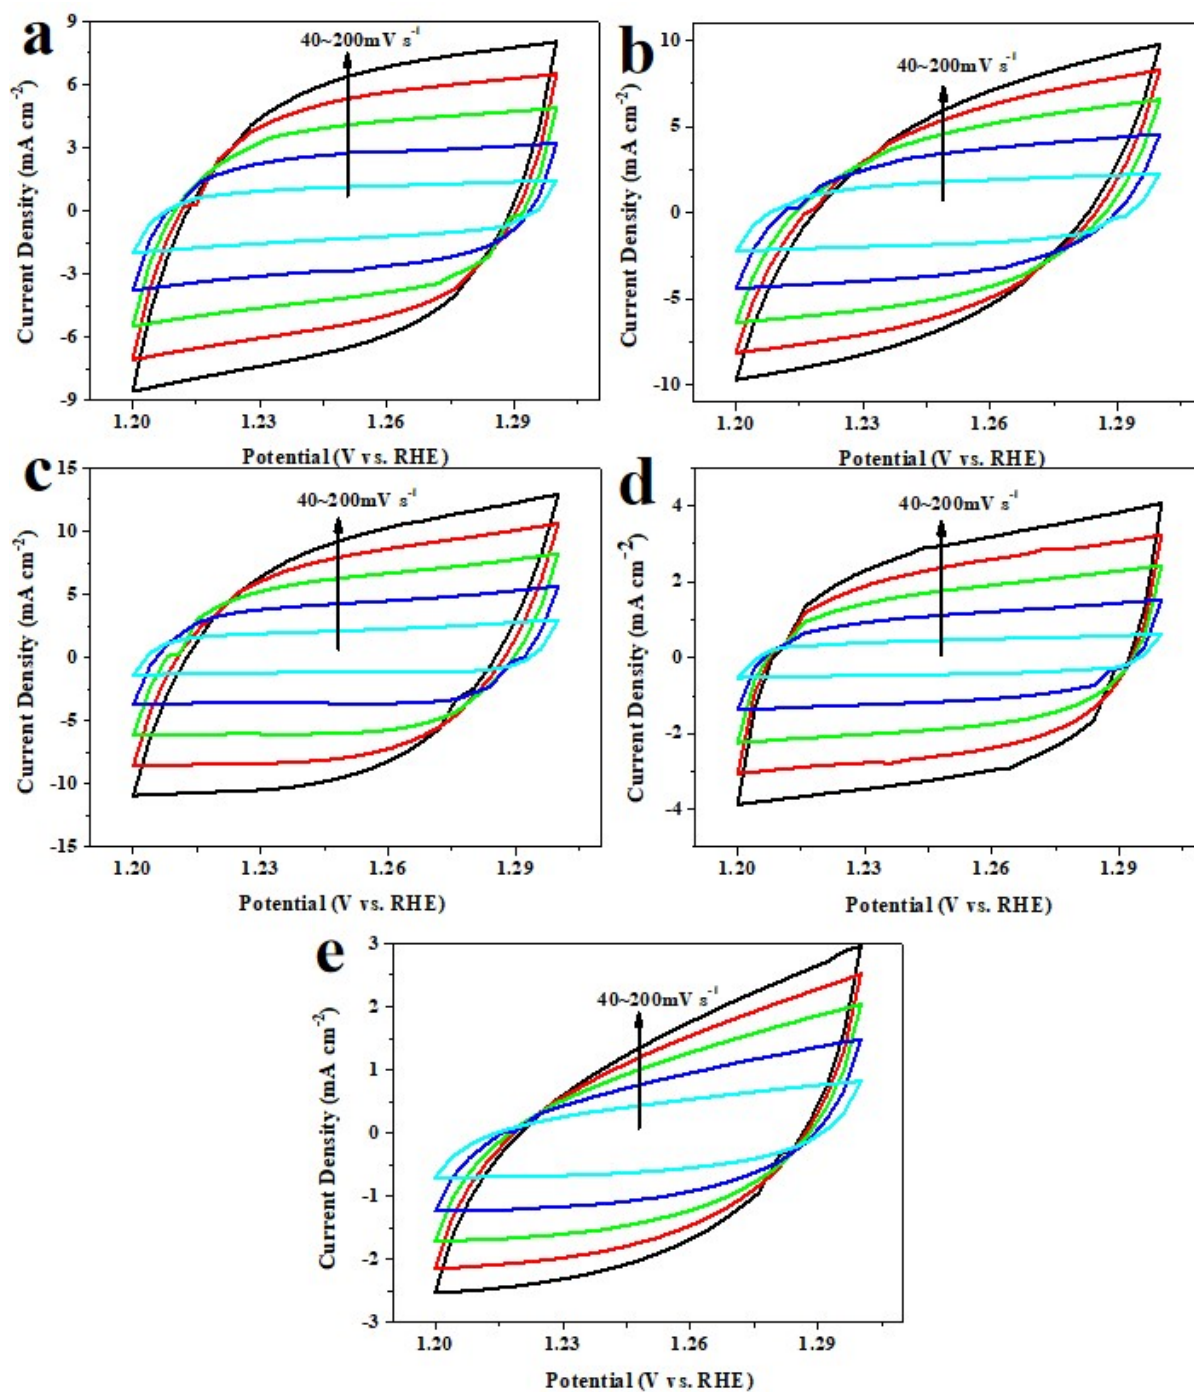

**Figure S13** Cyclic voltammetry curves at 1.2~1.3 V vs RHE for (a) Ru@FeCoP, (b) FeCoP, (c) CoP, and (d) Co (e) FeCo-PBA with different scan rates from 40 to 200  $\text{mV s}^{-1}$ .

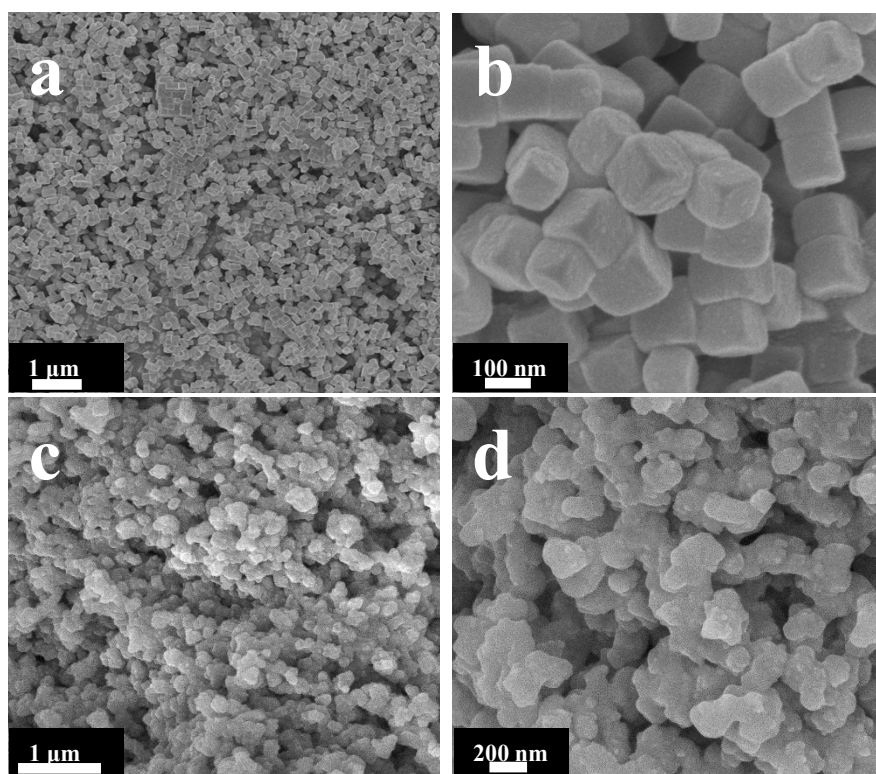

**Figure S14** SEM images of (a-b) FeCo-PBA-solid, (c-d) Ru@FeCoP-solid.



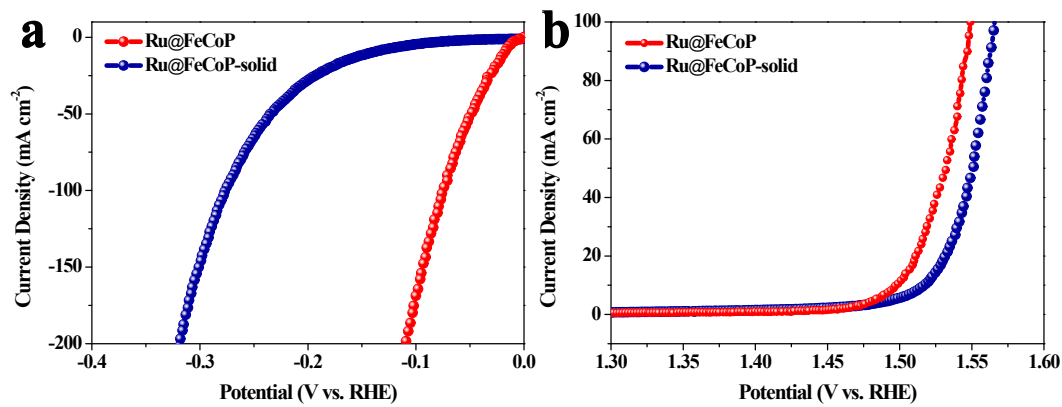

**Figure S15** Polarization curves for Ru@FeCoP and Ru@FeCoP-solid of (a) HER, (b) OER.

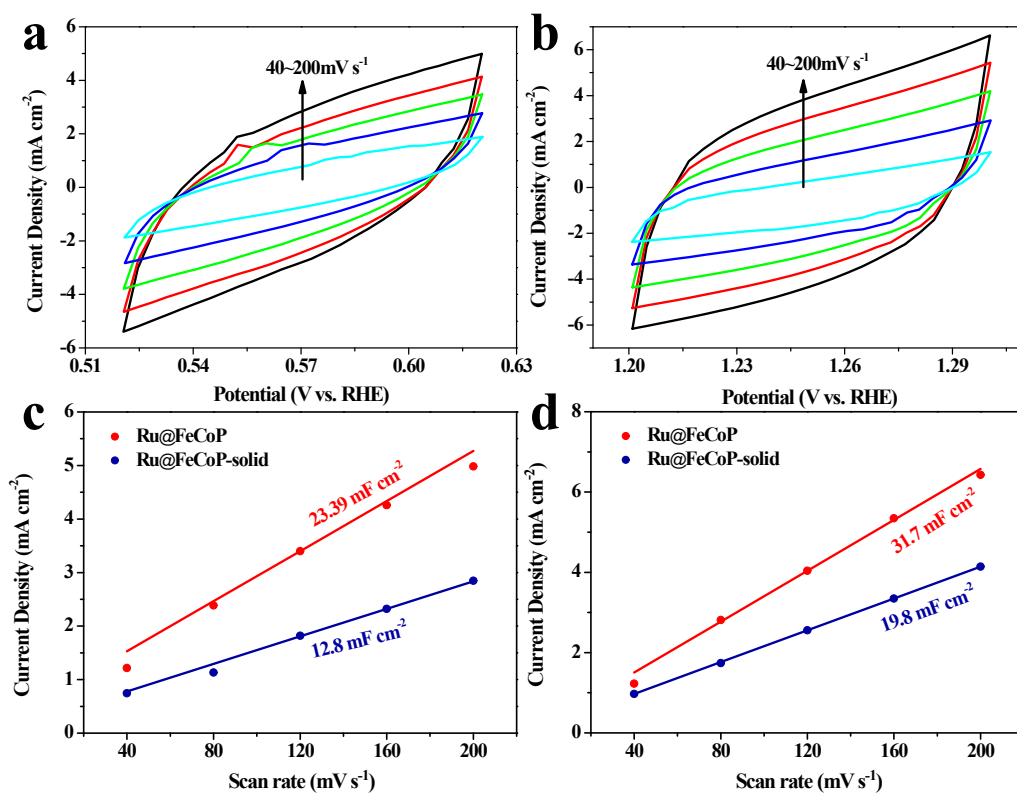

**Figure S16** Cyclic voltammetry curves for Ru@FeCoP-solid of (a) HER, (b) OER with different scan rates from 40 to 200  $\text{mV s}^{-1}$ , and  $C_{dl}$  measurements of (c) HER, and (d) OER of Ru@FeCoP and Ru@FeCoP-solid.

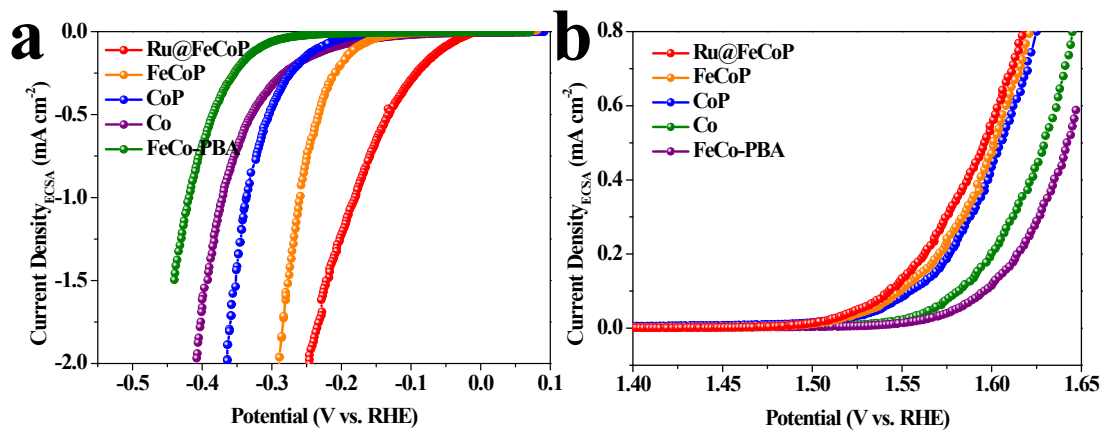

**Figure S17** ECSA-normalized (a) HER polarization curves, and (b) OER polarization curves of the Ru@FeCoP, FeCoP, CoP, Co and FeCo-PBA.

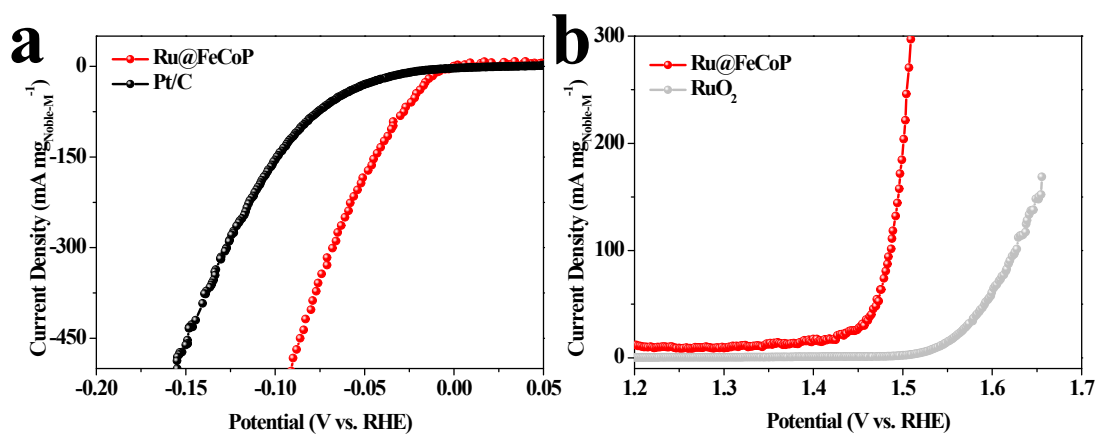

**Figure S18** Noble-metal-mass (a) HER polarization curves of Ru@FeCoP and Pt/C, and (b) OER polarization curves of the Ru@FeCoP and RuO<sub>2</sub>.

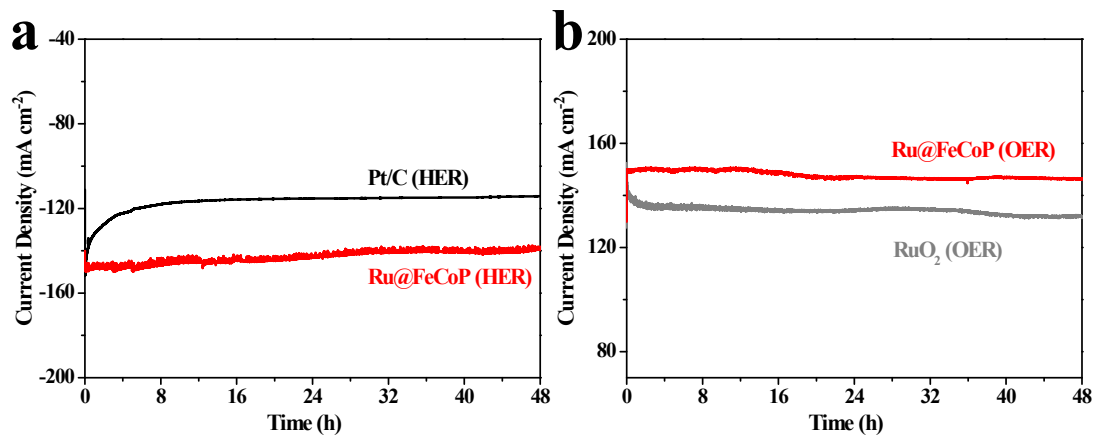

**Figure S19** The chronoamperometry test of (a) HER, and (b) OER for Ru@FeCoP, commercial Pt/C, and RuO<sub>2</sub> in 1.0 M KOH.

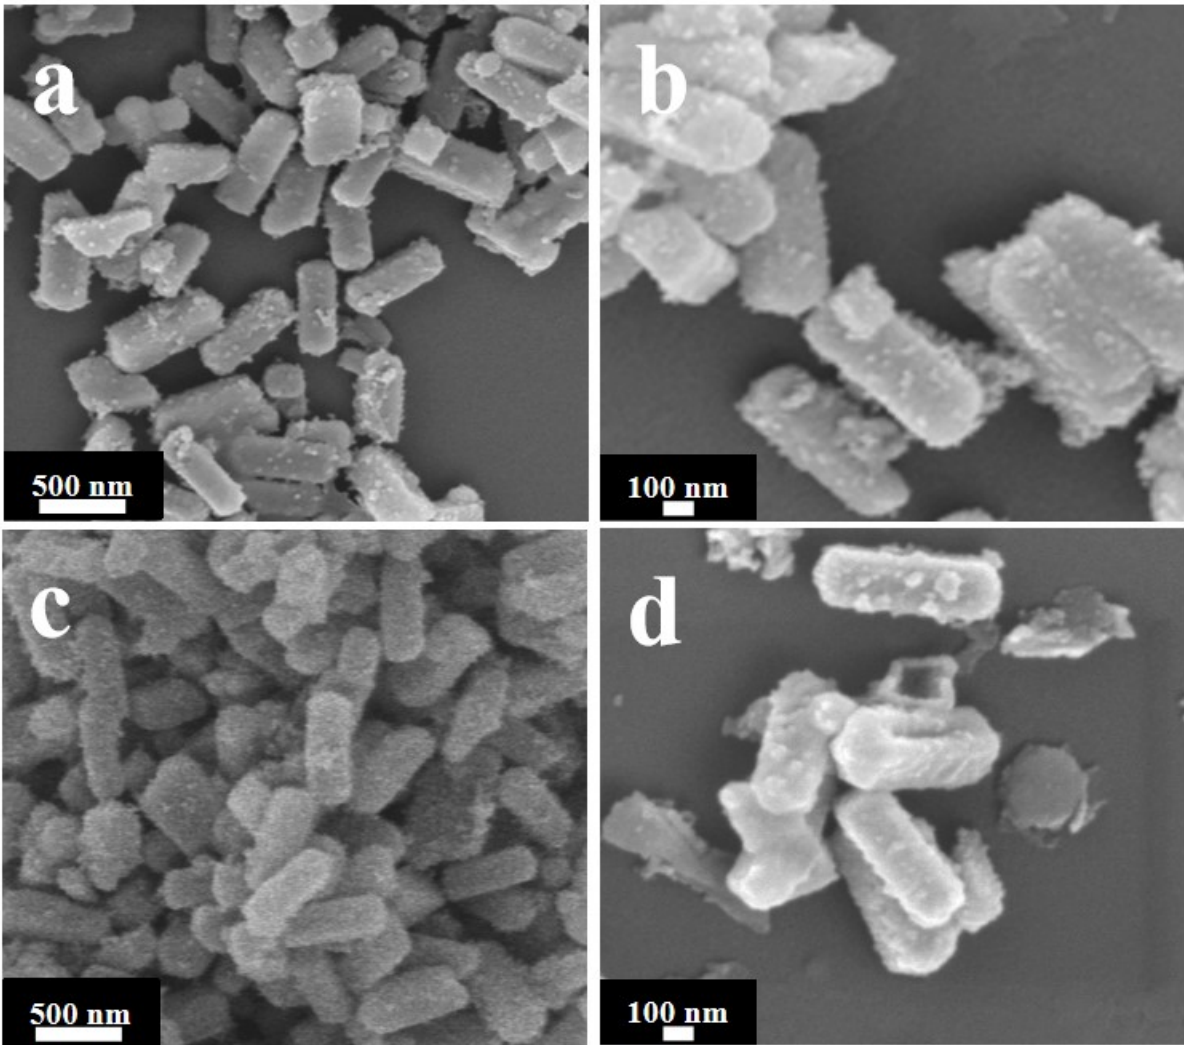

**Figure S20** SEM images of Ru@FeCoP (a-b) after HER, and (c-d) after OER.

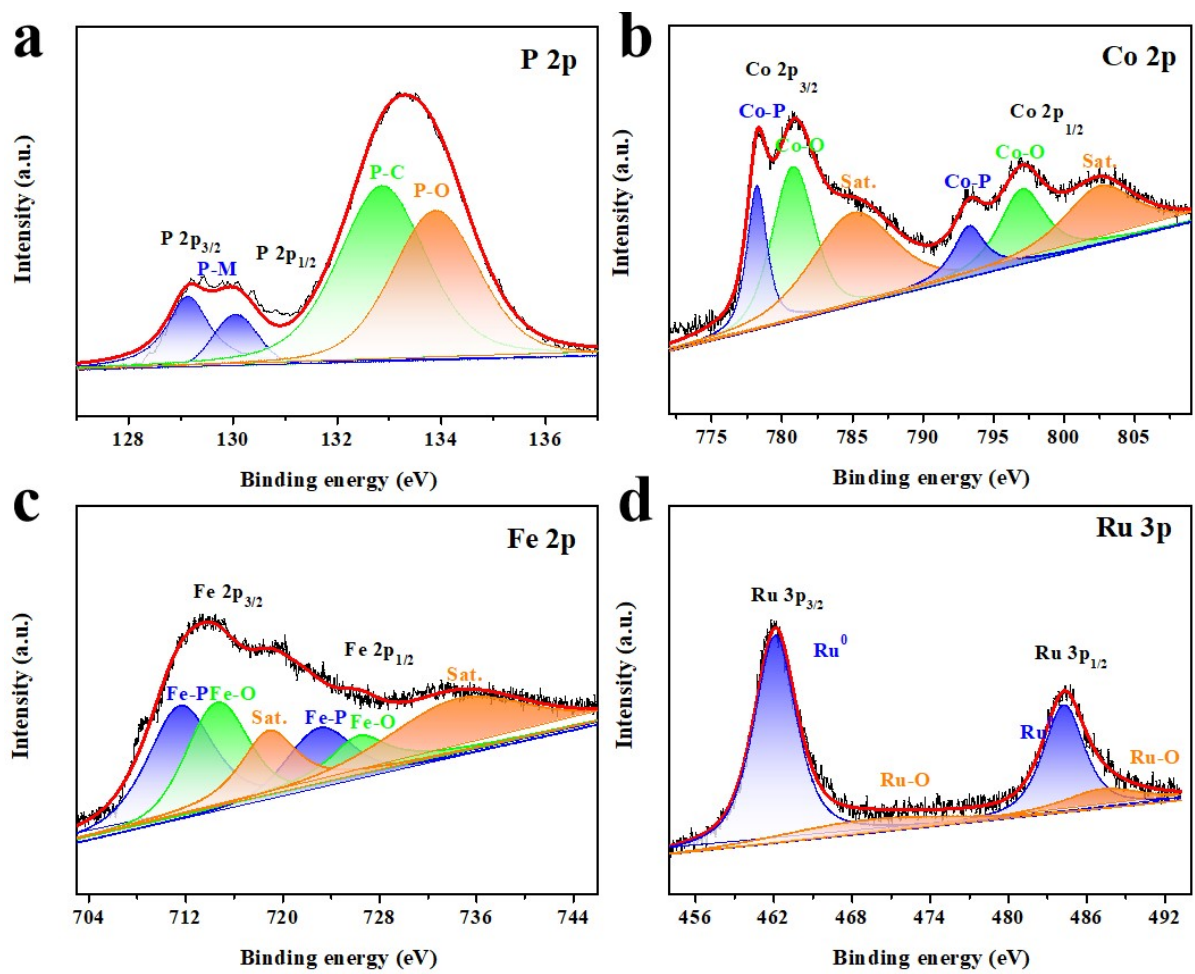

**Figure S21** XPS spectra of the Ru@FeCoP after HER stability test: (a) P 2p, (b) Co 2p, (c) Fe 2p, and (d) Ru 3p spectrum.

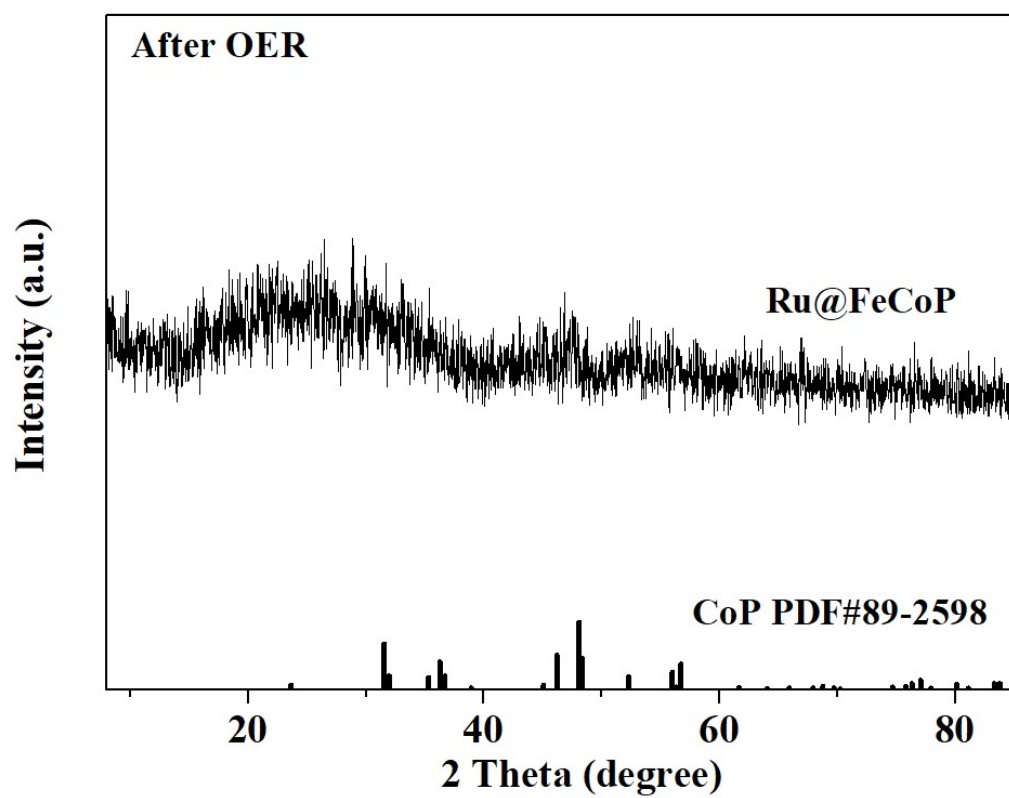

Figure S22 XRD patterns of Ru@FeCoP after OER.



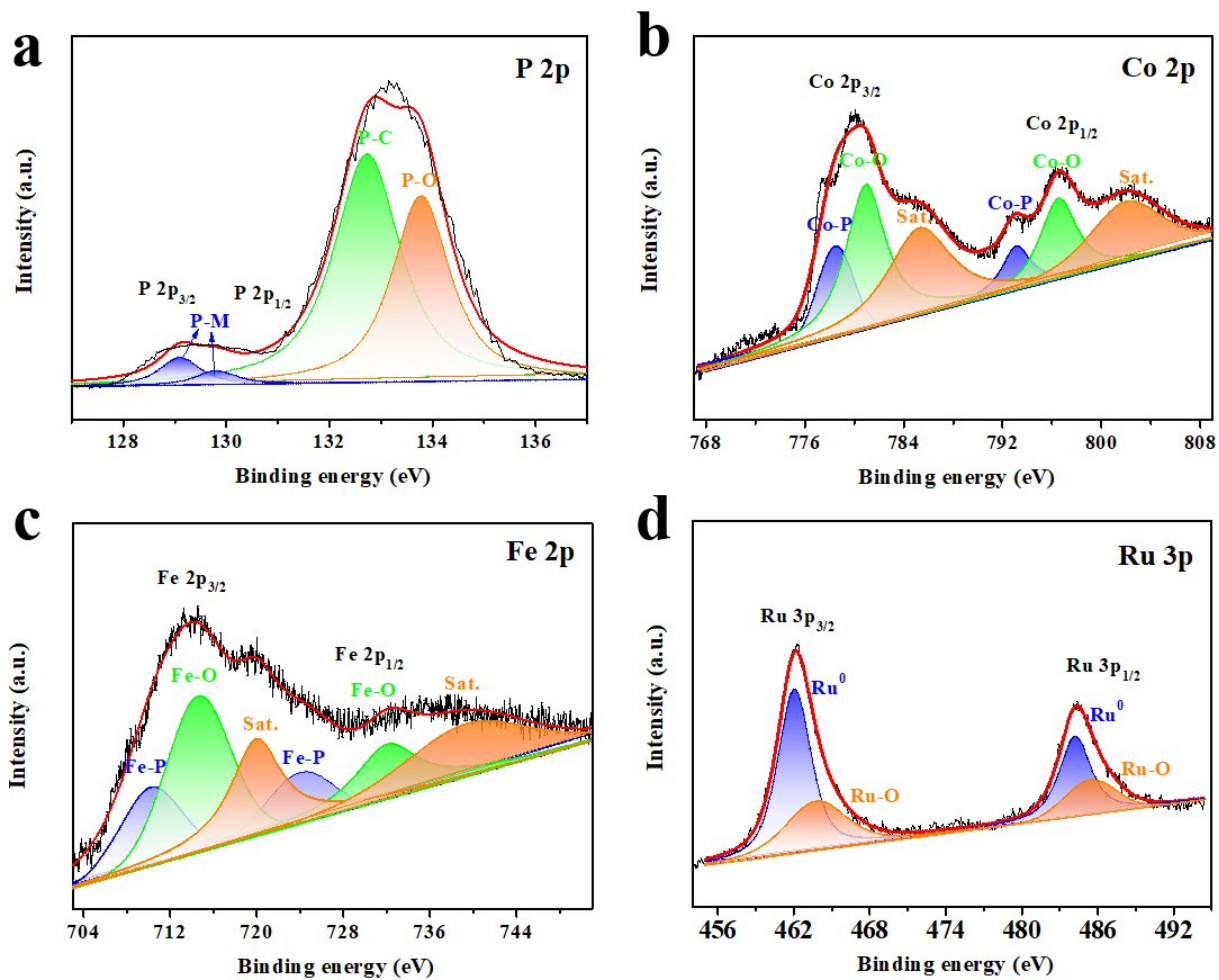

**Figure S23** XPS spectra of the Ru@FeCoP after OER stability test: (a) P 2p, (b) Co 2p, (c) Fe 2p, and (d) Ru 3p spectrum.

**Table S1** ICP-AES data of Ru@FeCoP.

| <b>Elements</b> | <b>Mass Fraction<br/>wt.%</b> |
|-----------------|-------------------------------|
| Ru              | 3.6965                        |
| Fe              | 6.2719                        |
| Co              | 22.5099                       |
| P               | 30.9449                       |

**Table S2.** Comparison of HER activity between Ru@FeCoP and recently reported noble metal-based electrocatalysts in alkaline conditions.

| <b>Electrocatalysts</b>               | <b><i>j</i><br/>(mA cm<sup>-2</sup>)</b> | <b><i>η</i><br/>(mV)</b> | <b>Tafel slope<br/>(mV dec<sup>-1</sup>)</b> | <b>Electrolyte<br/>solution</b> |           |
|---------------------------------------|------------------------------------------|--------------------------|----------------------------------------------|---------------------------------|-----------|
| Ru@FeCoP                              | 10                                       | 17.4                     | 31.6                                         | 1.0 M KOH                       | This work |
| Pt/VS <sub>2</sub>                    | 10                                       | 77                       | 39.46                                        | 1.0 M KOH                       | S1        |
| Ru-3D NCN                             | 10                                       | 17                       | 42                                           | 1.0 M KOH                       | S2        |
| 3D RuCu NCs                           | 10                                       | 18                       | 59                                           | 1.0 M KOH                       | S3        |
| Ru-MnFeP/NF                           | 10                                       | 35                       | 36                                           | 1.0 M KOH                       | S4        |
| RuNiCoP/NF                            | 10                                       | 44                       | 45.4                                         | 1.0 M KOH                       | S5        |
| Ru-SAs@N-TC                           | 10                                       | 14                       | 58                                           | 1.0 M KOH                       | S6        |
| S-RuP@NPSC                            | 10                                       | 90                       | 90.23                                        | 1.0 M KOH                       | S7        |
| Rh <sub>x</sub> P/NPC                 | 10                                       | 19                       | 36                                           | 1.0 M KOH                       | S8        |
| IrMo NPs                              | 10                                       | 38                       | 60                                           | 1.0 M KOH                       | S9        |
| Ru/np-MoS <sub>2</sub>                | 10                                       | 30                       | 31                                           | 1.0 M KOH                       | S10       |
| Ru/Co <sub>3</sub> O <sub>4</sub> NWs | 10                                       | 30.96                    | 69.75                                        | 1.0 M KOH                       | S11       |

**Table S3.** Comparison of OER activity between Ru@FeCoP and recently reported noble metal-based electrocatalysts in alkaline conditions.

| <b>Electrocatalysts</b>                              | <b><i>j</i><br/>(mA cm<sup>-2</sup>)</b> | <b><i>η</i><br/>(mV)</b> | <b>Tafel slope<br/>(mV dec<sup>-1</sup>)</b> | <b>Electrolyte<br/>solution</b> | <b>Refs.</b> |
|------------------------------------------------------|------------------------------------------|--------------------------|----------------------------------------------|---------------------------------|--------------|
| Ru@FeCoP                                             | 10                                       | 262                      | 45.7                                         | 1.0 M KOH                       | This work    |
| Ru/N-BP2000-4wt%                                     | 10                                       | 285                      | 70                                           | 1.0 M KOH                       | S12          |
| Au@NiCo <sub>2</sub> S <sub>4</sub>                  | 10                                       | 299                      | 44                                           | 1.0 M KOH                       | S13          |
| Ru-CoNi@NC-2                                         | 10                                       | 268                      | 75                                           | 1.0 M KOH                       | S14          |
| 2D PdIr PNSs                                         | 10                                       | 285                      | 76.1                                         | 1.0 M KOH                       | S15          |
| Ru-RuP <sub>x</sub> -Co <sub>x</sub> P               | 10                                       | 291                      | 85.4                                         | 1.0 M KOH                       | S16          |
| RuO <sub>2</sub> /Co <sub>3</sub> O <sub>4</sub> NBs | 10                                       | 302                      | 75.77                                        | 1.0 M KOH                       | S17          |
| RuO <sub>2</sub> /Co <sub>3</sub> O <sub>4</sub>     | 10                                       | 305                      | 69                                           | 1.0 M KOH                       | S18          |
| Co-PB/Pt                                             | 10                                       | 300                      | 68                                           | 1.0 M KOH                       | S19          |
| 0.6 Ni-Fe-Pt                                         | 10                                       | 333                      | 65                                           | 1.0 M KOH                       | S20          |
| Pt-LiCoO <sub>2</sub>                                | 10                                       | 440                      | 82                                           | 1.0 M KOH                       | S21          |

**Table S4.** Comparison of electrochemical surface area (ECSA) of Ru@FeCoP catalyst and other comparative samples for HER.

| <b>Electrocatalysts</b> | $C_{dl}$<br>(mF cm <sup>-2</sup> ) | $C_{DL}$<br>(mF) | <b>ECSA</b><br>(cm <sup>-2</sup> ) |
|-------------------------|------------------------------------|------------------|------------------------------------|
| Ru@FeCoP                | 23.39                              | 23.39            | 584.75                             |
| FeCoP                   | 17.78                              | 17.78            | 444.5                              |
| CoP                     | 14.18                              | 14.18            | 354.5                              |
| Co                      | 10.79                              | 10.79            | 269.75                             |
| FeCo-PBA                | 5.34                               | 5.34             | 133.5                              |

$$C_{DL} = C_{dl} * S; S=1*1 \text{ cm}^2; ECSA = C_{DL}/C_s; C_s = 0.04 \text{ mF cm}^{-2}$$

**Table S5.** Comparison of electrochemical surface area (ECSA) of Ru@FeCoP catalyst and other comparative samples for OER.

| <b>Electrocatalysts</b> | $C_{dl}$<br>(mF cm <sup>-2</sup> ) | $C_{DL}$<br>(mF) | <b>ECSA</b><br>(cm <sup>-2</sup> ) |
|-------------------------|------------------------------------|------------------|------------------------------------|
| Ru@FeCoP                | 31.7                               | 31.7             | 792.5                              |
| FeCoP                   | 26.8                               | 26.8             | 670                                |
| CoP                     | 23.1                               | 23.1             | 577.5                              |
| Co                      | 15.5                               | 15.5             | 387.5                              |
| FeCo-PBA                | 7.06                               | 7.06             | 176.5                              |

$$C_{DL} = C_{dl} * S; S=1*1 \text{ cm}^2; ECSA = C_{DL}/C_s; C_s = 0.04 \text{ mF cm}^{-2}$$

**Table S6.** Comparison of overall water splitting activity between Ru@FeCoP| Ru@FeCoP and recently reported noble metal-based electrocatalysts in alkaline conditions.

| <b>Electrocatalysts</b>                       | <b><i>j</i><br/>(mA cm<sup>-2</sup>)</b> | <b><i>Voltage</i><br/>(mV)</b> | <b>Electrolyte<br/>solution</b> | <b>Refs.</b> |
|-----------------------------------------------|------------------------------------------|--------------------------------|---------------------------------|--------------|
| Ru@FeCoP                                      | 10                                       | 1.508                          | 1.0 M KOH                       | This work    |
| O-CoP                                         | 10                                       | 1.60                           | 1.0 M KOH                       | S22          |
| S-CoO <sub>x</sub>                            | 10                                       | 1.63                           | 1.0 M KOH                       | S23          |
| Cu <sub>0.075</sub> Co <sub>0.925</sub> P/CP/ | 10                                       | 1.55                           | 1.0 M KOH                       | S24          |
| NiFeLDH@NiCoP                                 | 10                                       | 1.57                           | 1.0 M KOH                       | S25          |
| Co-NC/CF                                      | 10                                       | 1.65                           | 1.0 M KOH                       | S26          |
| Ceria/Ni-TMO                                  | 10                                       | 1.58                           | 1.0 M KOH                       | S27          |
| V-CoP@a-CeO <sub>2</sub>                      | 10                                       | 1.56                           | 1.0 M KOH                       | S28          |
| Fe-Doped Ni-Co-P                              | 10                                       | 1.61                           | 1.0 M KOH                       | S29          |
| NiFeP/SG                                      | 10                                       | 1.54                           | 1.0 M KOH                       | S30          |
| CoFe@NiFe/NF                                  | 10                                       | 1.59                           | 1.0 M KOH                       | S31          |

## Refs.

1. M. Lu, S. Kong, S. Yan, P. Zhou, T. Yu and Z. Zou, *J. Mater. Chem. A*, 2022, DOI: 10.1039/D1TA11011J.
2. H. Yoon, H. J. Song, B. Ju and D. W. Kim, *Nano Res.*, 2020, **13**, 2469-2477.
3. Q. Chen, Y. Nie, M. Ming, G. Fan, Y. Zhang and J. Hu, *Chin. J. Catal.*, 2020, **41**, 1791-1811.
4. Y. Du, W. Wang, H. Zhao, Y. Liu, S. Li and L. Wang, *J. Mater. Chem.*, 2020, **8**, 25165-25172.
5. Y. Zhao, Y. Gao, Z. Chen, Z. Li, T. Ma, Z. Wu and L. Wang, *Appl. Catal. B: Environ.*, 2021, **297**, 120395.
6. Y. Wang, G. Qian, Q. Xu, H. Zhang, F. Shen, L. Luo and S. Yin, *Appl. Catal. B: Environ.*, 2021, **286**, 119881.
7. D. H. Kweon, M. S. Okyay, S. J. Kim, J. P. Jeon, H. J. Noh, N. Park, J. Mahmood and J. B. Baek, *Nat. Commun.*, 2021, **11**, 1-10.
8. B. Yan, D. Liu, X. Feng, M. Shao and Y. Zhang, *Adv. Funct. Mater.*, 2020, **30**, 2003007.
9. D. Chen, Z. Pu, R. Lu, P. Ji, P. Wang, J. Zhu, C. Lin, H. W. Li, X. Zhou, Z. Hu, F. Xia, J. Wu and S. Mu, *Adv. Energy Mater.*, 2020, **10**, 2000814.
10. D. Cao, J. Wang, H. Xu and D. Cheng, *Small*, 2020, **16**, 2000924.
11. P. V. Sarma, T. V. Vineesh, R. Kumar, V. Sreepal, R. Prasannachandran, A. K. Singh and M. M. Shaijumon, *ACS Catal.*, 2020, **10**, 6753-6762.
12. Z. Liu, L. Zeng, J. Yu, L. Yang, J. Zhang, X. Zhang, F. Han, L. Zhao, X. Li, H. Liu and W. Zhou, *Nano Energy*, 2021, **85**, 105940.
13. H. Li, M. Zhang, L. Yi, Y. Liu, K. Chen, P. Shao and Z. Wen, *Appl. Catal. B Environ.*, 2021, **280**, 119412.
14. X. Liu, F. Liu, J. Yu, G. Xiong, L. Zhao, Y. Sang, S. Zuo, J. Zhang, H. Liu and W. Zhou, *Adv. Sci.*, 2020, **7**, 2001526.
15. Q. Qin, H. Jang, L. Chen, G. Nam, X. Liu and J. Cho, *Adv. Energy Mater.*, 2018, **8**, 1801478.
16. A. Yang, K. Su, S. Wang, Y. Wang, X. Qiu, W. Lei and Y. Tang, *Appl. Surf. Sci.*, 2020, **510**, 145408
17. J. Guo, X. Zhang, Y. Sun, L. Tang, Q. Liu and X. Zhang, *Chem. Eng.*, 2017, **5**, 11577-11583.



18. H. Hu, Farhad M. D, Kazim, Q. Zhang, K. Qu, Z. Yang and W. Cai, *Chemcatchem*, 2019, **11**, 4327-4333.
19. B. Y. Guo, X. Y. Zhang, X. Ma, T. S. Chen, Y. Chen, M. L. Wen, J. F. Qin, J. Nan, Y. M. Chai and B. Dong, *nt. J. Hydrog. Energy*, 2020, **45**, 9575-9582.
20. W. Wang, S. Xi, Y. Shao, W. Sun, S. Wang, J. Gao, C. Mao, X. Guo and G. Li, *Chem. Eng.*, 2019, **7**, 17227-17236.
21. M. Fu, Q. Zhang, Y. Sun, G. N, X. Fan, H. Wang, H. Lu, Y. Zhang and H. Wang, *Int. J. Hydrog. Energy*, 2020, **45**, 20832-20842.
22. S22 G. Zhou, M. Li, Y. Li, H. Dong, D. Sun, X. Liu, L. Xu, Z. Tian and Y. Tang, *Adv. Funct. Mater.* 2020, **30**, 1905252.
23. X. Yu, Z. Y. Yu, X. L. Zhang, P. Li, B. Sun, X. Gao, K. Yan, H. Liu, Y. Duan, M. R. Gao, G. Wang and S. H. Yu, *Nano Energy*, 2020, **71**, 104652.
24. L. Yan, B. Zhang, J. Zhu, S. Zhao, Y. Li, B. Zhang, J. Jiang, X. Ji, H. Zhang and P. K. Shen, *J. Mater. Chem. A*, 2019, **7**, 14271-14279.
25. H. Zhang, X. Li, A. Hähnel, V. Naumann, C. Lin, S. Azimi, S. L. Schweizer, A. W. Maijenburg and R. B. Wehrspohn, *Adv. Funct. Mater.*, 2018, **28**, 1706847.
26. H. Huang, S. Zhou, C. Yu, H. Huang, J. Zhao, L. Dai and J. Qiu, *Energy Environ. Sci.*, 2020, **13**, 545-553.
27. X. Long, H. Lin, D. Zhou, Y. An and S. Yang, *ACS Energy Lett.* 2018, **3**, 290-296.
28. L. Yang, R. Liu, L. Jiao, *Adv. Funct. Mater.*, 2020, **30**, 1909618.
29. M. Guo, S. Song, S. Zhang, Y. Yan, K. Zhan, J. Yang and B. Zhao, *ACS Sustain. Chem. Eng.*. 2020, **8**, 7436-7444
30. R. Q. Li, B. L. Wang, T. Gao, R. Zhang, C. Xu, X. Jiang, J. Zeng, Y. Bando, P. Hu, Y. Li and X. B. Wang, *Nano Energy*, 2020, **58**, 870-876.
31. R. Yang, Y. Zhou, Y. Xing, D. Li, D. Jiang, M. Chen, W. Shi and S. Yuan, *Appl. Catal. B*, 2019, **253**, 131-139.
